# Supplementary material for: pH-independent optical sensing of heparin based on ionic liquid-capped gold nanoparticles
Source: Royal Society of Chemistry journal article supplement (doi:10.1039/c3an36895e), 2013-01-01
Supplement: c3an36895e.pdf [file c3an36895e.pdf]

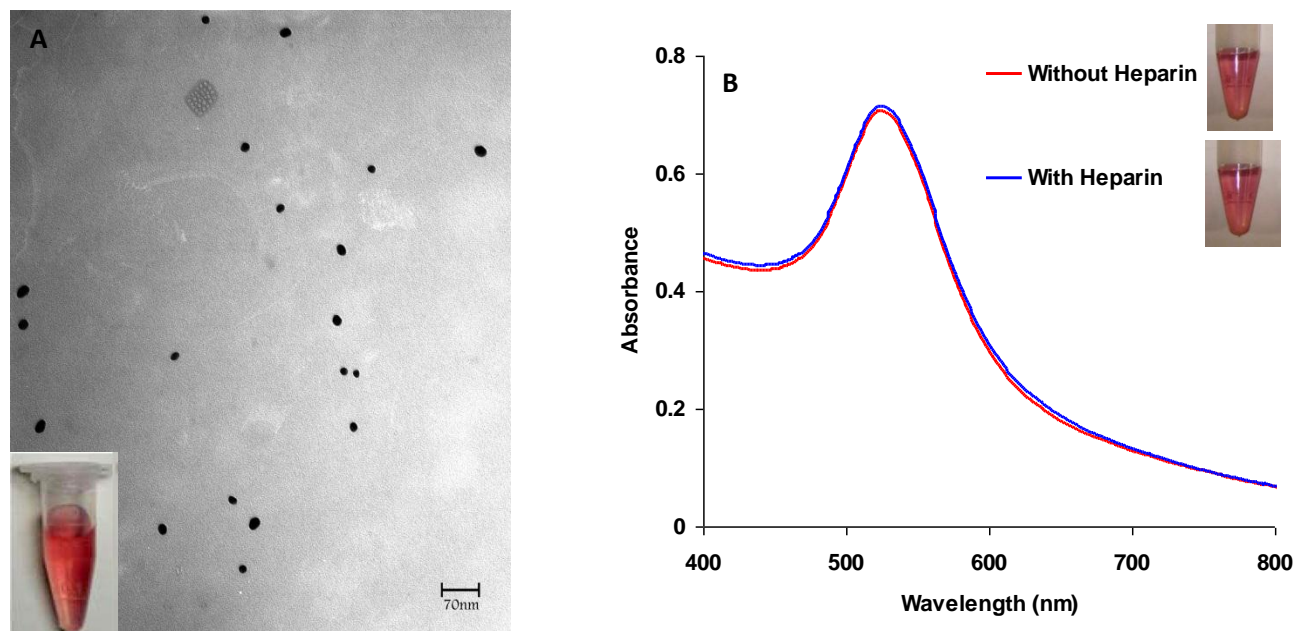

Figure S1

**Figure S1.** A) TEM images and photograph of the citrate-stabilized AuNPs. B) absorbance spectra of the citrate-capped AuNPs in the absence in the presence of heparin ( $6.2 \mu\text{g mL}^{-1}$ ).

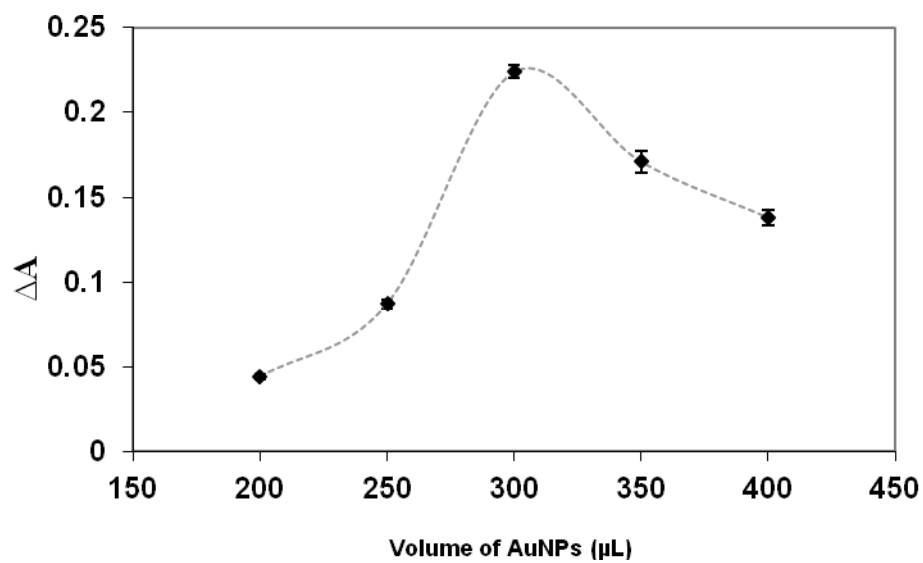

Figure S2

**Figure S2.** Difference Absorbance at 528 nm for 200-400  $\mu\text{l}$  of AuNPs after increasing heparin ( $3 \mu\text{g mL}^{-1}$ ).  $\Delta A$  is the absorbance difference before and after addition of Heparin to AuNPs.

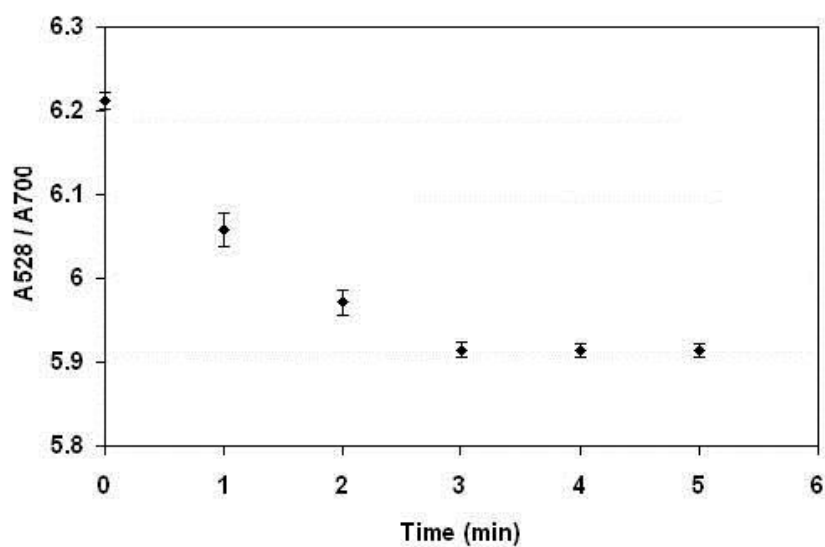

Figure S3

**Figure S3.** Time-dependent changing in the absorption ratio ( $A_{528}/A_{700}$ ) of AuNPs after addition of  $3.0 \mu\text{g mL}^{-1}$  heparin. Experimental conditions:  $200 \mu\text{L}$  phosphate buffer (pH 7),  $300 \mu\text{L}$  AuNPs, and room temperature

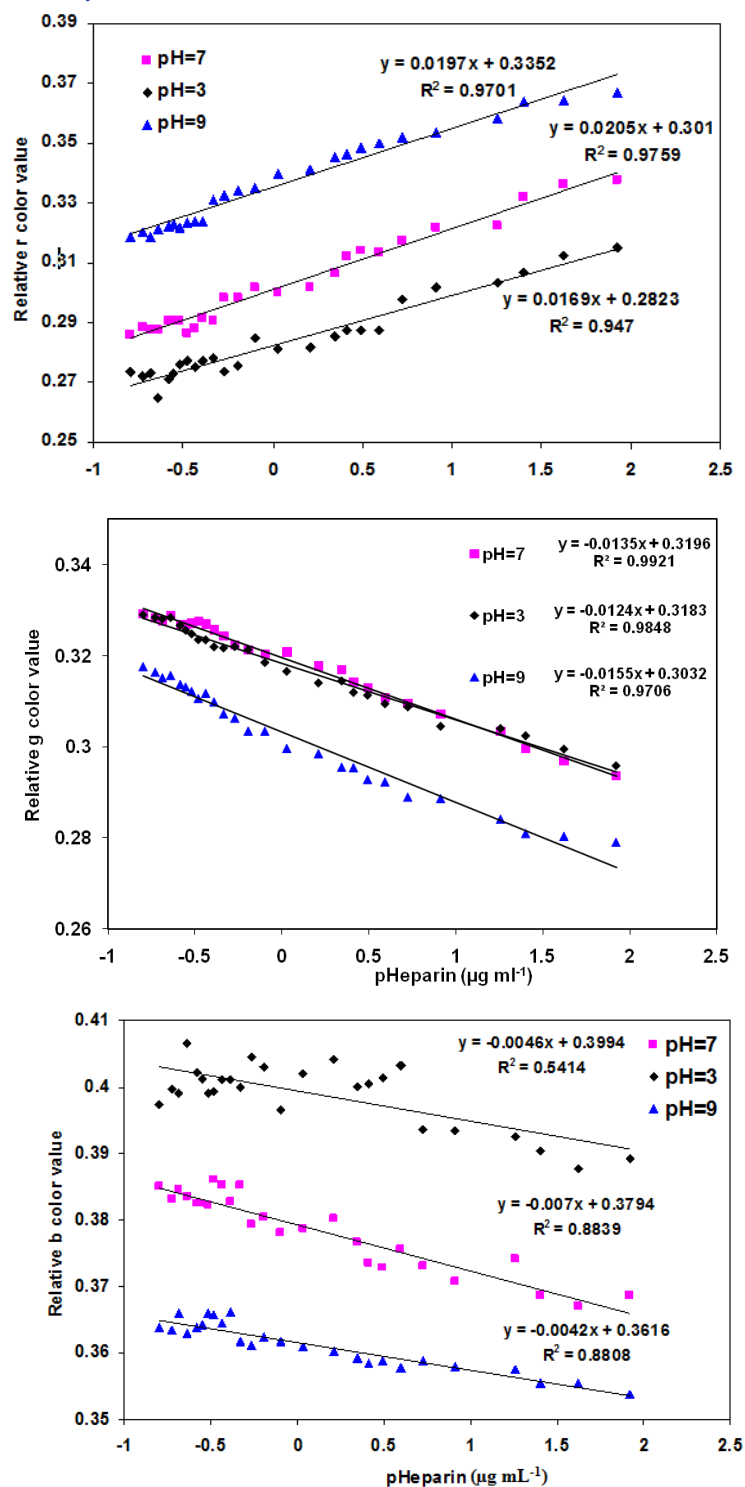

Figure S4

**Fig S4.** Calibration graph of heparin at different pH and color values(r, g, b)

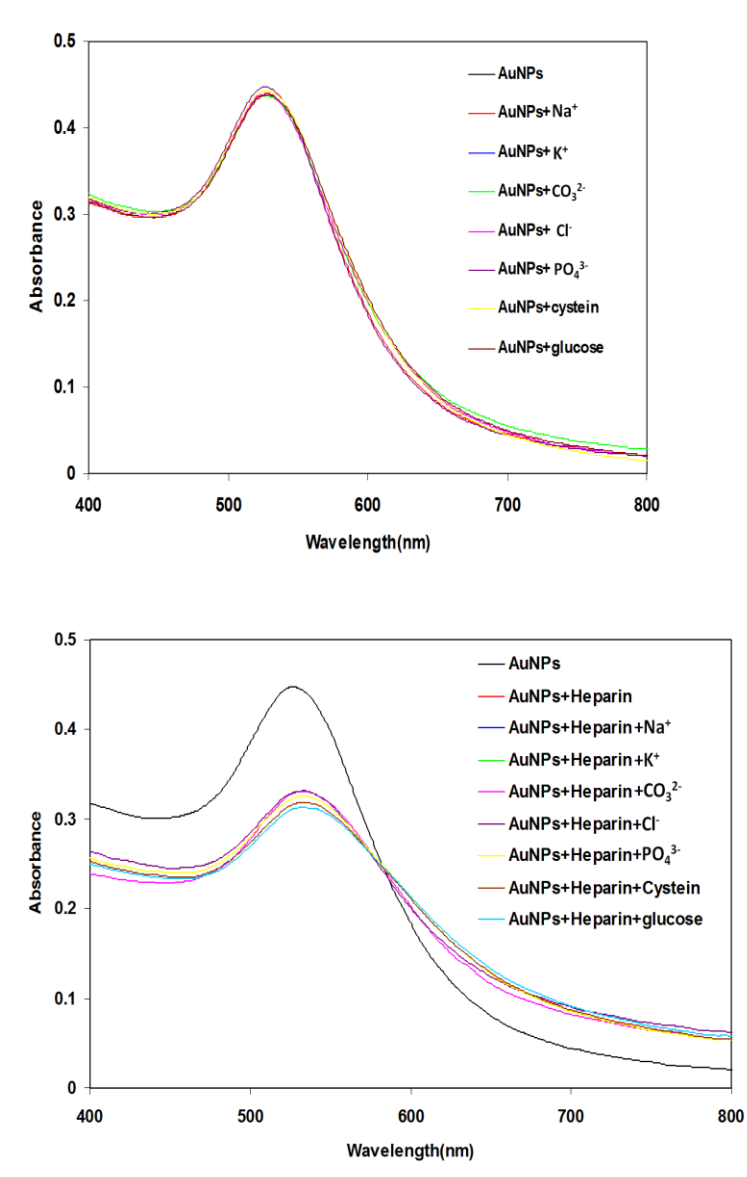

Figure S5

**Figure S5.** Effect of some possible interfering species on the absorbance spectra of AuNPs (A) and AuNPs-heparin (B). Experimental condition: 200μL phosphate buffer, 300 μLAuNPs, and room temperature

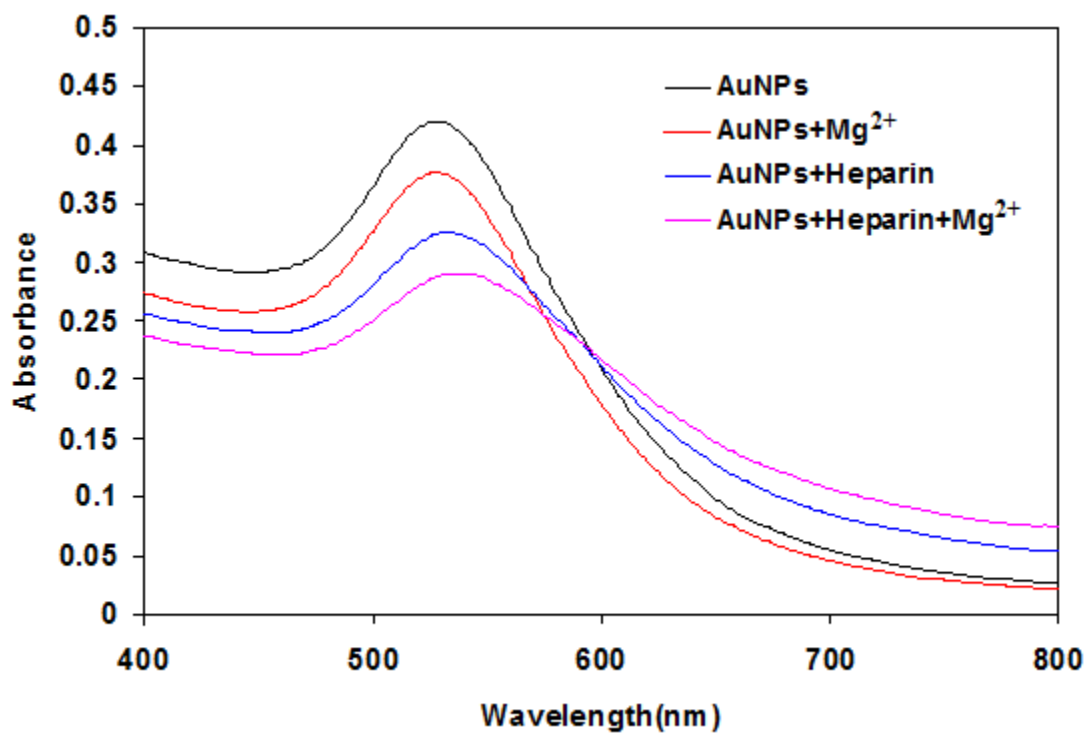

Figure S6

**Figure S6.** Effect of  $\text{Mg}^{2+}$  on the absorbance spectra of AuNPs and AuNPs-heparin. Experimental condition: 200  $\mu\text{L}$  phosphate buffer, 300  $\mu\text{L}$  AuNPs, and room temperature

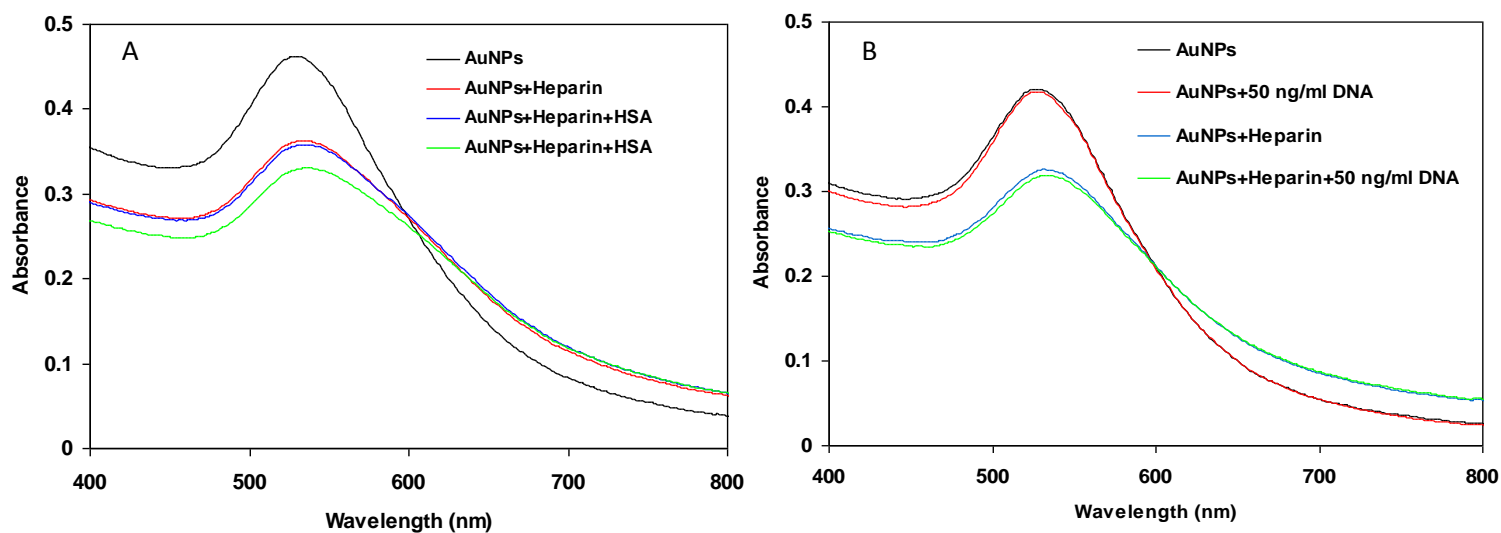

Figure S7

**Figure S7.** Absorption spectra of A) AuNPs alone (black), AuNPs + 3  $\mu\text{g/mL}$  heparin (red), AuNPs + 3  $\mu\text{g/mL}$  heparin + HSA (blue), and AuNPs + 3  $\mu\text{g/mL}$  heparin + 8  $\mu\text{g/mL}$  HSA (green), B) AuNPs alone (black), AuNPs + 50 ng/mL DNA (red), AuNPs + 3  $\mu\text{g/mL}$  heparin (blue), and AuNPs + 3  $\mu\text{g/mL}$  heparin + 50 ng/mL DNA (green). Experimental conditions: 200  $\mu\text{L}$  phosphate buffer (pH 7), 300  $\mu\text{L}$  AuNPs, and room temperature
